# Supplementary material for: MEK inhibitors enhance therapeutic response towards ATRA in NF1 associated malignant peripheral nerve sheath tumors (MPNST) in-vitro
Source: PubMed Central journal article supplement (PMC5683628; doi:10.1371/journal.pone.0187700), 2017-11-13
Supplement: pone.0187700.s008.pdf [file pone.0187700.s008.pdf]

## Supporting Information - S8 Fig

**Table A:**  
Concentrations of pharmaceutical agents used for combination treatment

|           | T265 cells  | S462 cells  | NSF1 cells |
|-----------|-------------|-------------|------------|
| U0126     | 2.5 $\mu$ M | 2.5 $\mu$ M | 10 $\mu$ M |
| PD0325901 | 10 nM       | 10 nM       | 100 nM     |
| ATRA      | 25 $\mu$ M  | 10 $\mu$ M  | 50 $\mu$ M |

**Table B:**  
Primer sequences for RT-PCR

F - forward, R - reverse, P – probe; PCR primer and conditions were optimized in order to guarantee one single PCR product for each PCR reaction. Amplicon size was verified by resolving on agarose gels for conventional PCR\*. Single amplicons were verified by melting curve analysis after quantitative PCR#. PCR via manufactured TaqMan probes did not require amplicon verification°.

| Gene                 |   | Sequence (5' → 3')                                      | Amplicon length (bp) |
|----------------------|---|---------------------------------------------------------|----------------------|
| GAPDH <sup>#</sup>   | F | accactcctccaccttggac                                    | 76                   |
|                      | R | cataccaggaatgagcttgacaa                                 |                      |
|                      | P | ctggcattgccctcaacgacca                                  |                      |
| CRABP2 <sup>°</sup>  |   | Gene Expression Assay Applied Biosystems: Hs00275636_m1 | not specified        |
| FABP5 <sup>°</sup>   |   | Gene Expression Assay Applied Biosystems: Hs02339439_g1 | not specified        |
| ZNF423 <sup>°</sup>  |   | Gene Expression Assay Applied Biosystems: Hs00323880_m1 | not specified        |
| CYP26A1 <sup>#</sup> | F | ctggacatgcaggcactaaa                                    | 100                  |
|                      | R | gccccaggtaagtatcaga                                     |                      |
| PDK1 <sup>#</sup>    | F | ggttacgggacagatgcagt                                    | 109                  |
|                      | R | cgtggttggtgtgtaatgc                                     |                      |
| RARA <sup>*</sup>    | F | ggcatgtccaaggagtctgtg                                   | 90                   |
|                      | R | cgtcagcgtgtagctctcag                                    |                      |
| RARB <sup>#</sup>    | F | ttctcagtgccatctgcttaatct                                | 130                  |
|                      | R | ggcttgctgggtcgtctttt                                    |                      |
| RARG <sup>*</sup>    | F | aacaaggtgaccaggaatcg                                    | 133                  |
|                      | R | tgtcaggtgacccttctcc                                     |                      |
| RXRA <sup>*</sup>    | F | caaggactgcctgattgaca                                    | 150                  |
|                      | R | ctggtcgactccacctcatt                                    |                      |
| RXRB <sup>*</sup>    | F | tcagcagccccagattaac                                     | 151                  |
|                      | R | attgcacatagccgtttgcc                                    |                      |
| RXRG <sup>*</sup>    | F | cgggattggaacatgaact                                     | 103                  |
|                      | R | taccccgtagtgctttctcg                                    |                      |

**Table C:**  
**Primer sequences used for bisulfite-sequencing**

| Sequence (relative to TSS) | Sequence (5' → 3') methylated | Sequence (5' → 3') un-methylated |
|----------------------------|-------------------------------|----------------------------------|
| -450 to -416               | tctgcttaaccctcaatgct          | tttggttaatttttaatggt             |
| -38 to +1                  | acacgagccctgagcatctg          | atatgagtttgagtatttg              |
| +277 to +299               | tcttggtccagaacctg             | tttggttttagaatttg                |
| +344 to +365               | gtgctccagcctaggagtcta         | gtgttttagtttaggagtta             |

**Table D:**  
**Primer sequences used for amplification of bisulfite converted DNA**  
(F – forward, R – reverse)

| Sequence (relative to TSS) |   | Sequence (5' → 3') methylated | Sequence (5' → 3') un-methylated |
|----------------------------|---|-------------------------------|----------------------------------|
| -450 to -416               | F | aataaagauuttgctcaagtgattg     | aataaagattttgtgtcaagtgattg       |
|                            | R | actcacgtaatacctaaagactctaaaaa | tttttagagctcttaggtattacgtgagt    |
| -38 to +1                  | F | gaattcgggtgggggatagttatata    | gaatttgggtgggggatagttatata       |
|                            | R | ccaccaacctctaaatctaacc        | gggtagatttagaggttggtgg           |
| +277 to +365               | F | gggagtttaggttagtttgggg        | gggagtttaggttagtttgggg           |
|                            | R | cccaacactttaacaattcctc        | gaggaattgutuaaagtgutggg          |

**Table E:**  
**Specifications of antibodies used for western blot analysis**

| Antibody  | Specification           | Species | Dilution | Manufacturer           |
|-----------|-------------------------|---------|----------|------------------------|
| α-CRABP2  | polyclonal              | rabbit  | 1:250    | Abcam (ab74365)        |
| α-β-actin | monoclonal              | mouse   | 1:200000 | Cell Signaling (#3700) |
| α-GAPDH   | polyclonal              | rabbit  | 1:10000  | Sigma (G9545)          |
| α-ERK     | monoclonal              | rabbit  | 1:2000   | Cell Signaling (#4696) |
| α-p-ERK   | monoclonal              | rabbit  | 1:4000   | Cell Signaling (#4370) |
| α-Rabbit  | monoclonal, hrp-coupled | mouse   | 1:10000  | Sigma (A 2074)         |
| α-Mouse   | polyclonal, hrp-coupled | goat    | 1:10000  | Sigma (A3682)          |
